# Supplementary figures and images for: Behavioral evidence for memory replay of video episodes in the macaque
Source: eLife journal article supplement (doi:10.7554/elife.54519), 2020-04-20

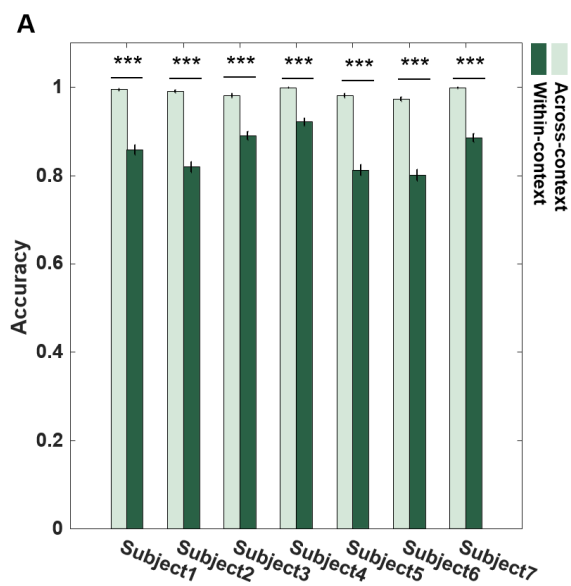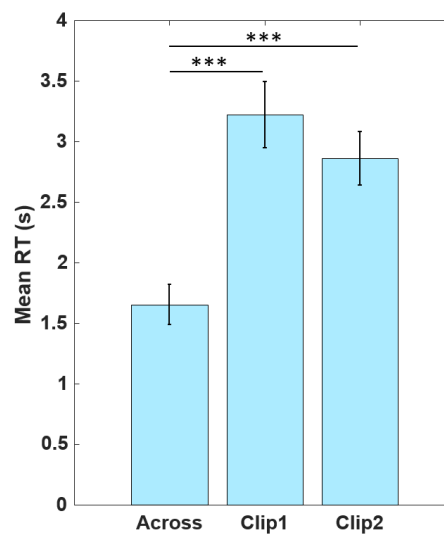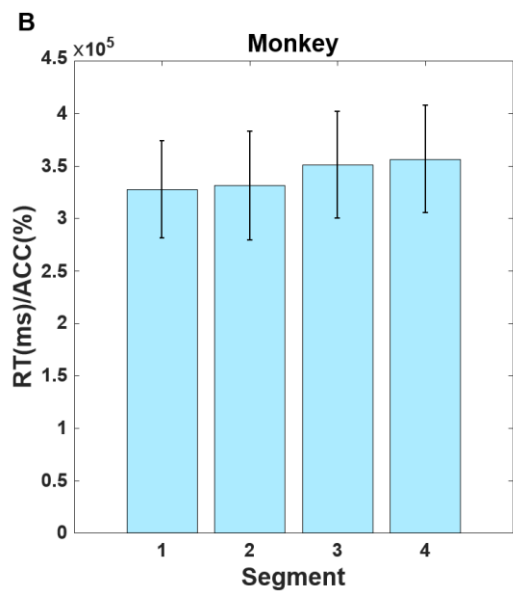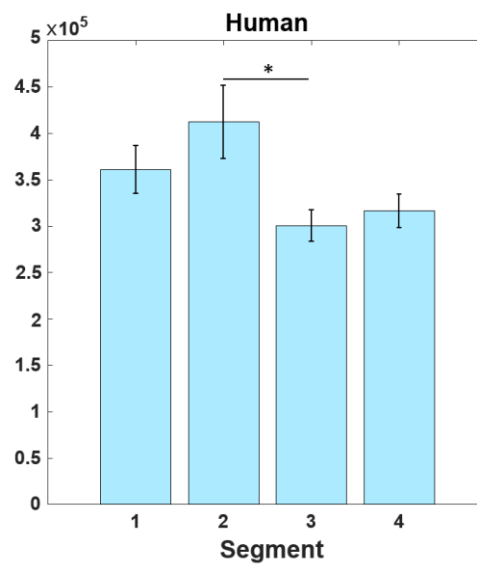

Supplement: supp [file elife_poa_e54519_Figure_1_figure_supplement_1.pdf › elife_poa_e54519_Figure_1_figure_supplement_1.pdf]

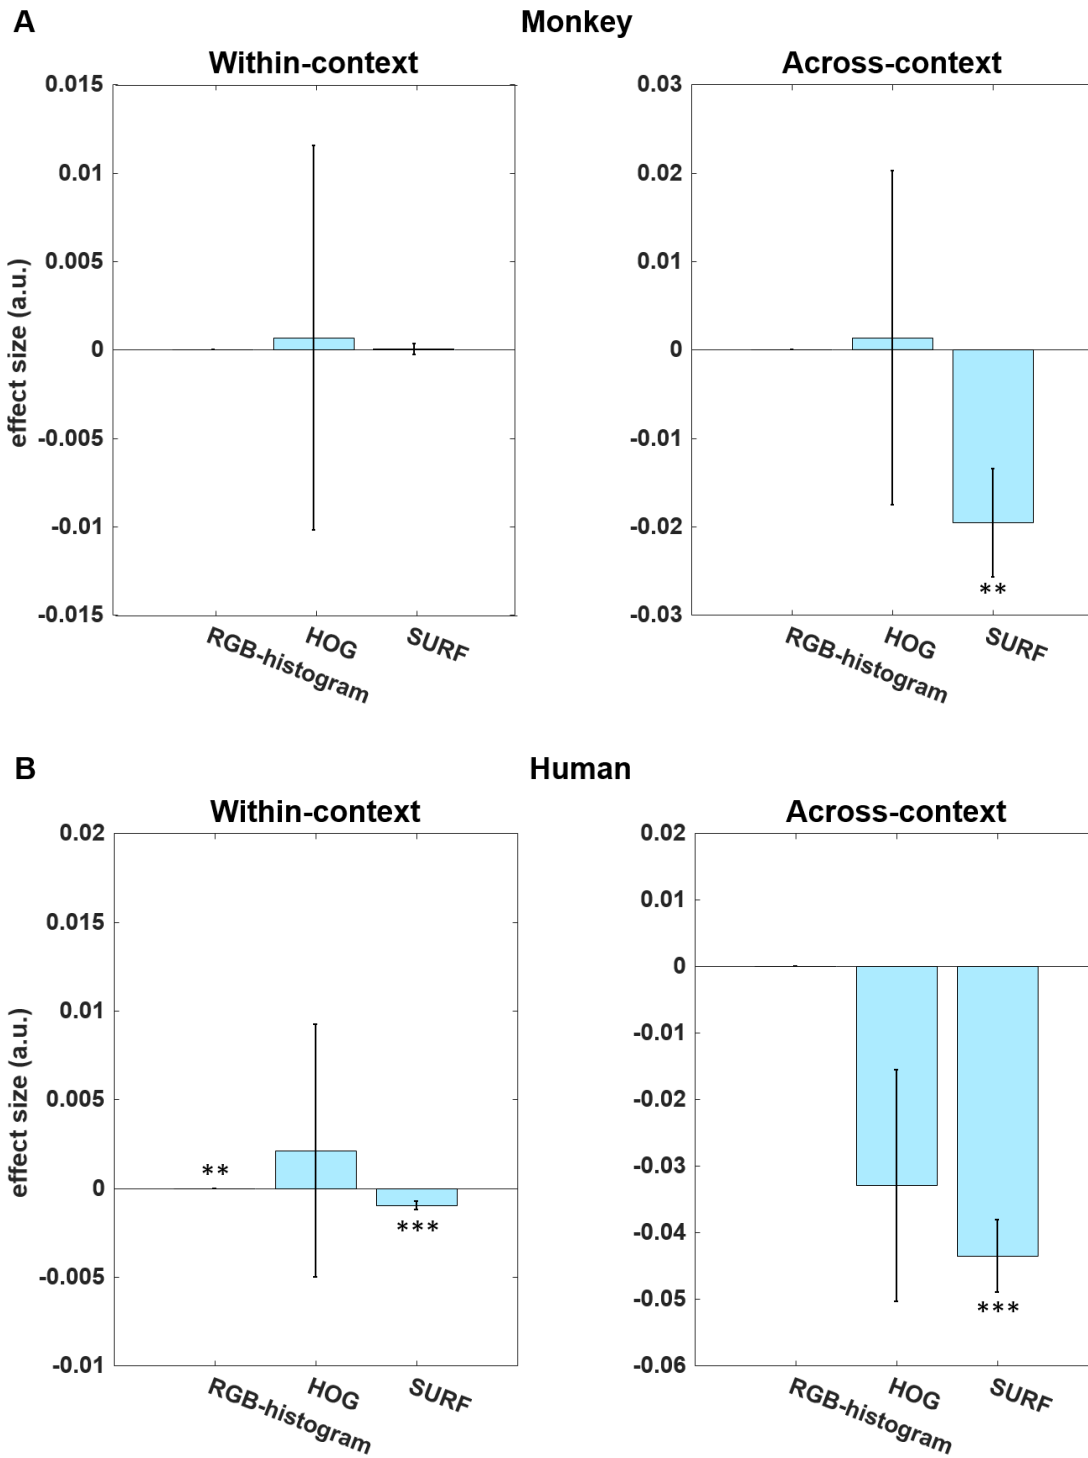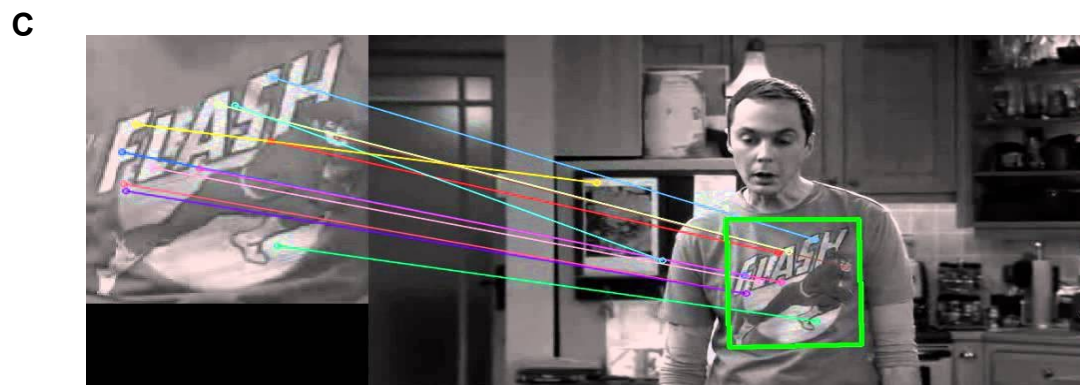

Supplement: supp [file elife_poa_e54519_Figure_6_figure_supplement_1.pdf › elife_poa_e54519_Figure_6_figure_supplement_1.pdf]
